# Supplementary material
Source: PubMed Central journal article supplement (PMC5006251)
Supplement: 00ee4018b91f8693e95b3d72abea8bf3_brain-2015-01846-File009.pdf [file 00ee4018b91f8693e95b3d72abea8bf3_brain-2015-01846-File009.pdf]

## **Supplemental legends**

### **SFigure 1. DEX-treatment decreases proliferation but does not enhance glioma cell death.**

A) Representative immunohistochemical staining for Ki67 in vehicle and DEX-treated mice. Corresponding bar graph shows that DEX-treatment induces significant decrease in proliferation compared to Vehicle-treated tumors. B) Representative immunohistochemical staining for cleaved caspase-3 (an apoptotic marker) and H&E in vehicle- and DEX-treated mice. Corresponding bar graphs show quantification of % of CC3+positive cells and necrotic index (Necrotic index = Area of necrosis ( $\mu\text{m}^2$ )/Total area of tumor section ( $\mu\text{m}^2$ )\* per 40X field within the tumor). No differences were observed with DEX treatment. N = 5 for all samples, p values were calculated with a Student's t-test. Scale bars: 50  $\mu\text{m}$  for A.

**SFigure 2. DEX does not suppress proliferation *in vitro*.** (A) *In vitro* MTT assay of three independent primary murine glioma cultures treated with 0.1, 1 and 10  $\mu\text{M}$  of DEX did not show a reduction in cell proliferation. (B) *In vitro* cell cycle analysis of primary murine glioma cultures treated with 3 days of 0.1, 1 and 10  $\mu\text{M}$  of DEX showed that DEX induced a slight but significant increase in the G1 population (from 50.97% in vehicle to 54.19 - 54.82% with DEX), with a corresponding decrease in the G2 population (from 34.45% in vehicle to 30.17 - 30.53% with DEX). However, the magnitude of these changes was not as large as anticipated based on the *in vivo* BLI and IHC responses. p values were calculated using a one-way ANOVA in comparison to DMSO, \* p<.05, \*\*p<.01, \*\*\* p<0.001.

### **SFigure 3. B20-4.1.1 treatment has no effect on non-tumor vasculature, decreases edema by T1-contrast MRI and increases myeloid cell infiltration in contrast to DEX.**

A) Representative images of CD31 staining of a non-tumor cortical area in vehicle- and B20-4.1.1-treated mice and corresponding graphs showing no significant differences in either total vessel area or average vessel size between B20-4.1.1- and vehicle-treated mice. B) Representative images of T1-contrast MRI scans of vehicle- and B20-4.1.1-treated mice. Graphs comparing tumor volumes according to T1-contrast MRI scans in vehicle- and B20-4.1.1-treated mice at the endpoint of survival, demonstrating a statistically significant difference in tumor size between vehicle- and B20-4.1.1-treated animals. C) Representative images of Iba1 staining for tumor-

associated microglia/macrophages in vehicle and B20-4.1.1-treated mice (upper panel) and vehicle and DEX treated tumors. Graphs comparing the total Iba1 positive areas in vehicles and B20-4.1.1 and DEX treated mice show that while there is significant increase in macrophage infiltration in B20-4.1.1 treated mice compare to vehicle, no significant difference was observed in DEX-treated compare to vehicle-treated mice. p values were calculated using an unpaired Student's t-test, \* $p < 0.05$  \*\* $p < 0.01$ , \*\*\*\* $p < 0.0001$ : Scale bars: 50  $\mu\text{m}$  for A and C.

**Figure 4. Olig2-positive tumor cells showed a significant increase in cell death in response to B20-4.1.1 treatment.** (A) Representative images of tumor sections and (B) corresponding quantification of cell death by TUNEL staining in Olig2-positive gliomas and CD31-positive endothelial cell populations. While there were no significant differences in the percentage of cell death of CD31-positive endothelial cells, there was a significant increase in the percentage of cell death of Olig2-positive tumor cells.  $n = 4$  and  $5$  for vehicle and B20-4.1.1, respectively. p values were calculated with an unpaired Student's t-test, \* $p < 0.05$ . Scale bars: 50  $\mu\text{m}$ .

**Table 1. Patient and treatment characteristics, categorized by use of DEX at the start of radiotherapy.** A) The median survival of all patients was 13.6 months (0.76-116.6 months) and 595 of the patients (96%) have died at the time of analysis. The median overall survival was 18.7, 18.4, 11.8, and 5.1 months in RTOG RPA classes III, IV, V, and VI, respectively ( $p < 0.0001$ ). B) Multivariate COX regression analysis of glioblastoma patients treated at MSKCC, examining RTOG RPA Class, concurrent TMZ, and DEX at the start of radiotherapy.

**Table 2. Patient and treatment characteristics, categorized by use of DEX at the start of radiotherapy for EORTC (A) and GGN (B).**

**Table 3. A) PFS and OS in the GGN cohort by steroid use. B) Multivariate analysis of the association of steroid administration and outcome in the GGN cohort**

**Table 4. Genes and top predicted cellular functions and canonical pathways of DEX regulated gene set.** A) The 25 most significantly changed probes on an illumina mouse-ref-8 array. The gene list is based on a greater than 1.5 fold change, with an ANOVA p value <

0.0005. This list was generated using Partek Genomics Suite array analysis software (v6.6). **B) Gene ontology analysis of DEX-regulated genes.** The top 5 most enriched predicted cellular function and canonical pathways, based on the 19 DEX-regulated genes.
