# Supplementary material
Source: PubMed Central journal article supplement (PMC5006251)
Supplement: cf32f26212cb76867e693100f56aea25_brain-2015-01846-File010.pdf [file cf32f26212cb76867e693100f56aea25_brain-2015-01846-File010.pdf]

# Supplemental Figure 1

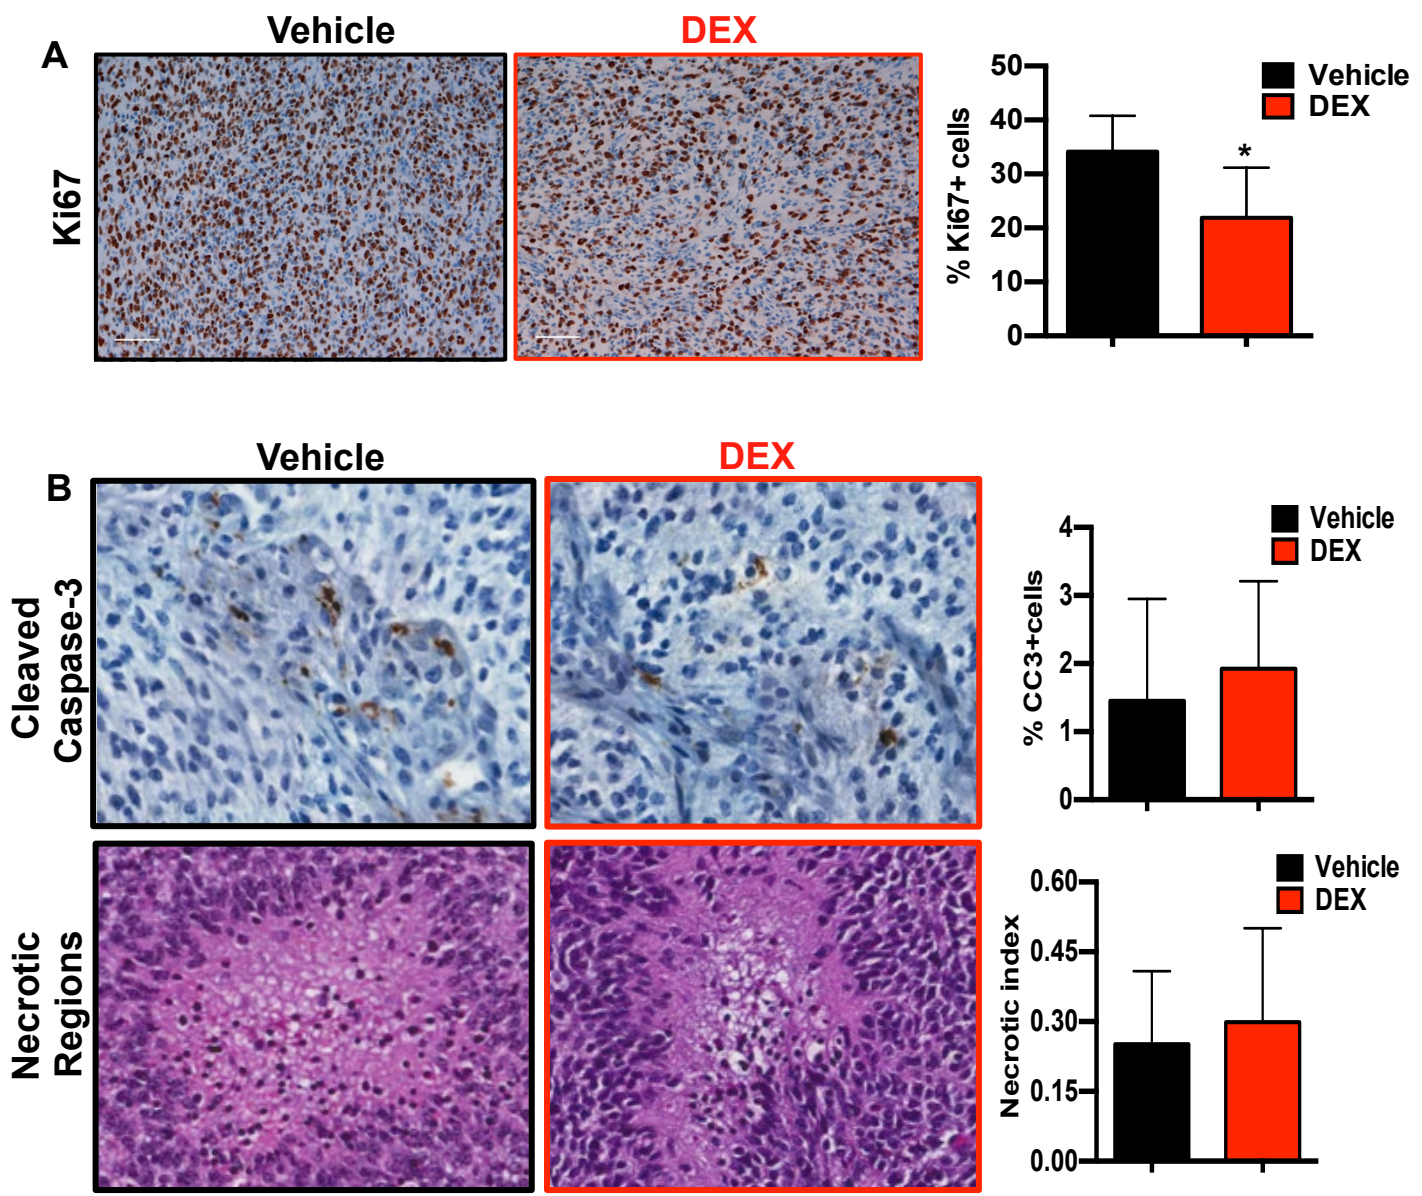

# Supplemental Figure 2

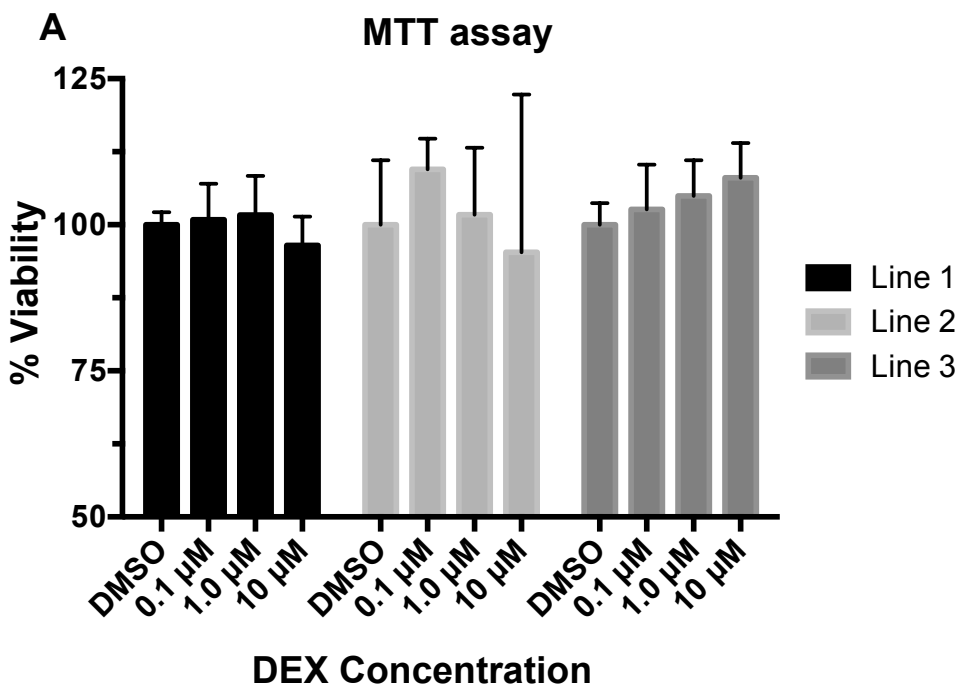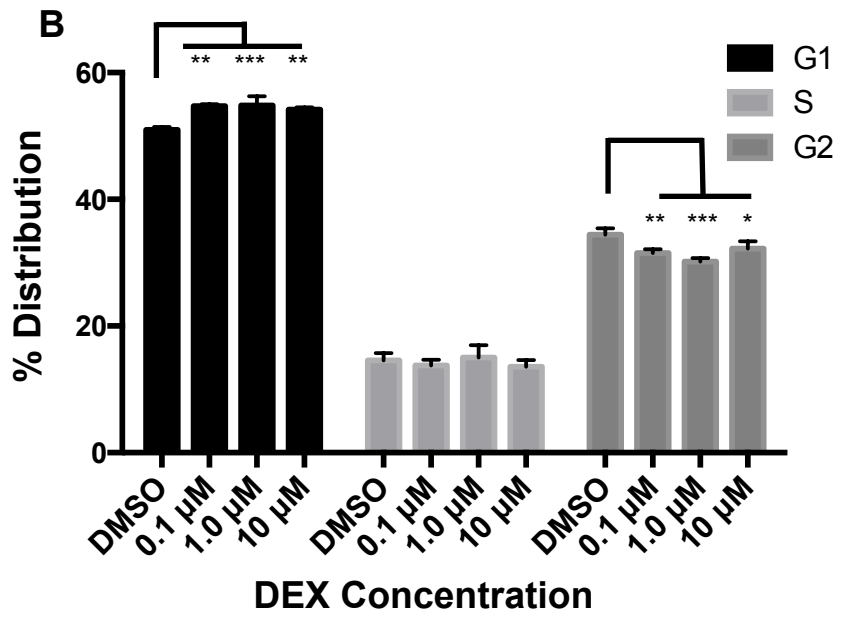

# Supplemental Figure 3

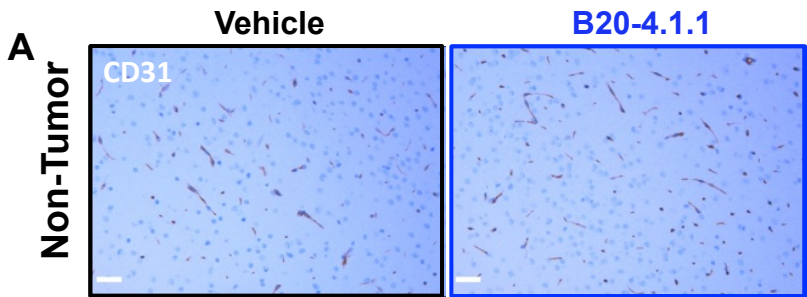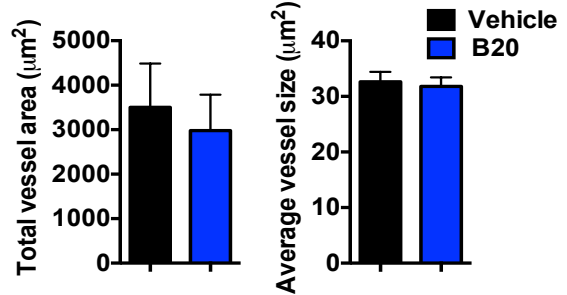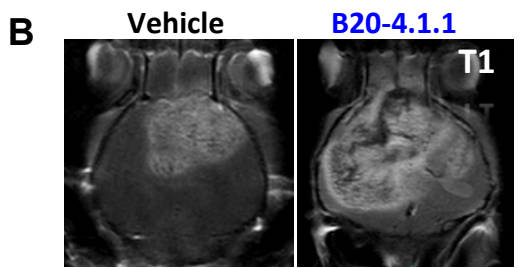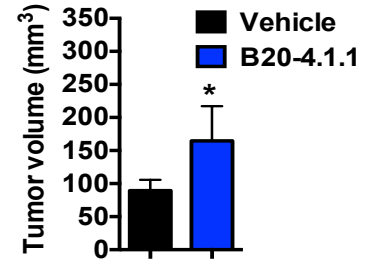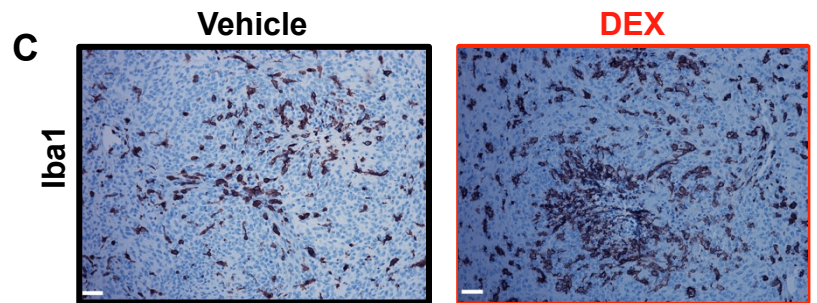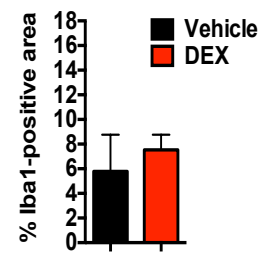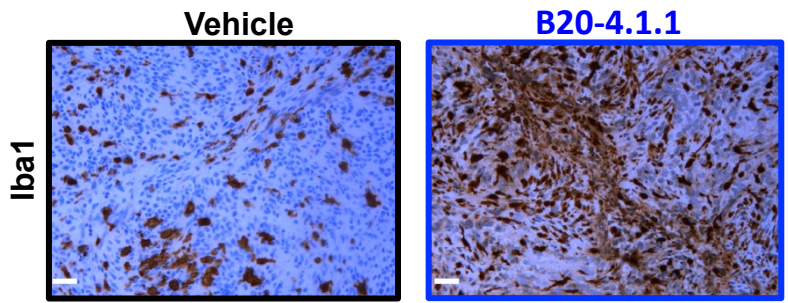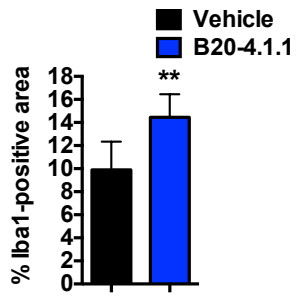



# Supplemental Figure 4

A

Vehicle

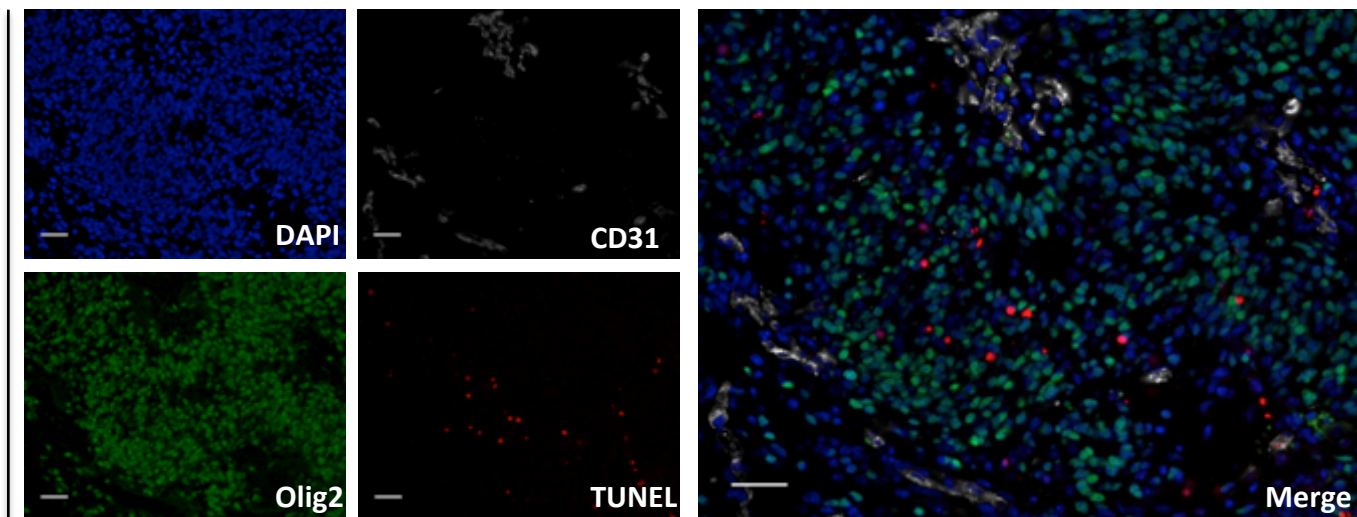

B20-4.1.1

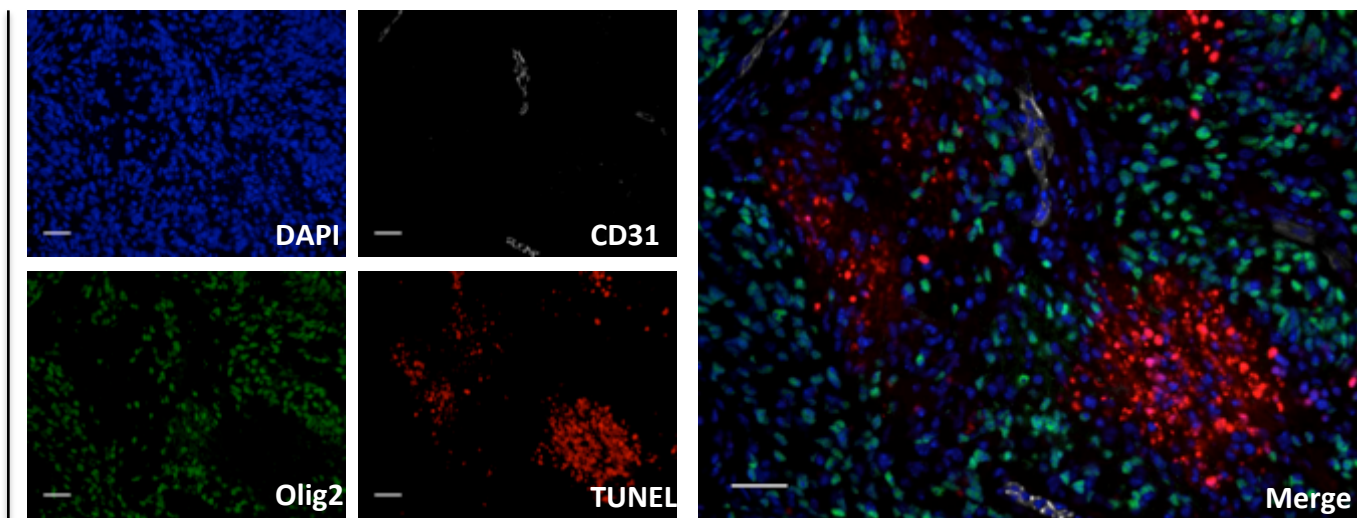

B

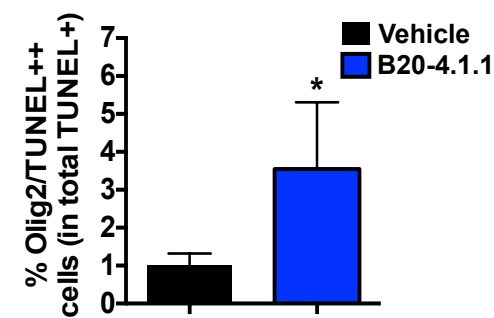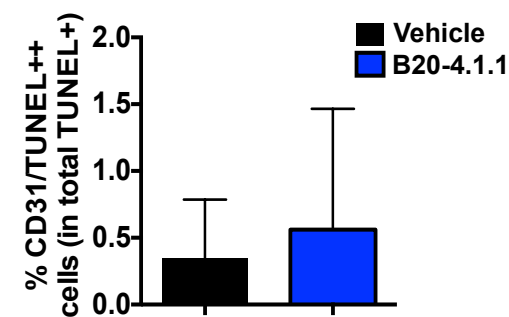

# Table S1. Patient and treatment characteristics with or without DEX at the start of radiotherapy

A

| Characteristic                             |              | N = 522 (84%)<br>+Steroid | N= 100 (16%)<br>-Steroid | p value <sup>^</sup> |
|--------------------------------------------|--------------|---------------------------|--------------------------|----------------------|
| <b>Sex n (%)</b>                           |              |                           |                          |                      |
|                                            | M            | 326 (62.5%)               | 70 (70%)                 | 0.1505               |
|                                            | F            | 196 (37.5%)               | 30 (30%)                 |                      |
| <b>Age, y</b>                              |              |                           |                          |                      |
|                                            | Median       | 59                        | 56                       |                      |
| <b>Age, n (%)</b>                          |              |                           |                          |                      |
|                                            | <50          | 130 (24.9%)               | 27 (27%)                 | 0.7063               |
|                                            | ≥50          | 392 (75.1%)               | 73 (73%)                 |                      |
| <b>KPS, n (%)</b>                          |              |                           |                          |                      |
|                                            | ≥90          | 201 (38.5%)               | 68 (68%)                 | < 0.0001             |
|                                            | ≥70 - <90    | 231 (44.3%)               | 28 (28%)                 |                      |
|                                            | <70          | 90 (17.2%)                | 4 (4%)                   |                      |
| <b>Mental Satus, n (%)</b>                 |              |                           |                          |                      |
|                                            | Normal       | 376 (72%)                 | 85 (85%)                 | 0.0207               |
|                                            | Abnormal     | 140 (26.8%)               | 15 (15%)                 |                      |
|                                            | Data Missing | 6 (1.1%)                  | 0 (0%)                   |                      |
| <b>Symptom Length</b>                      |              |                           |                          |                      |
|                                            | <12 wk       | 405 (77.6%)               | 76 (76%)                 | 0.7285               |
|                                            | ≥12 wk       | 117 (22.4%)               | 24 (24%)                 |                      |
| <b>Neurologic functional status, n (%)</b> |              |                           |                          |                      |
|                                            | Working      | 162 (31%)                 | 57 (57%)                 | < 0.0001             |
|                                            | Not Working  | 357 (68.4%)               | 43 (43%)                 |                      |
|                                            | Data Missing | 3 (0.6%)                  | 0 (0%)                   |                      |
| <b>Surgical Extent</b>                     |              |                           |                          |                      |
|                                            | Biopsy       | 97 (18.6%)                | 9 (9%)                   | 0.0032               |
|                                            | Resection    |                           |                          |                      |
|                                            | STR          | 231 (44.3%)               | 37 (37%)                 |                      |
|                                            | GTR          | 194 (37.2%)               | 54 (54%)                 |                      |
| <b>Radiation Dose</b>                      |              |                           |                          |                      |
|                                            | >54.4 Gy     | 407 (78%)                 | 90 (90%)                 | 0.0019               |
|                                            | ≤54.4        | 105 (20.1%)               | 6 (6%)                   |                      |
|                                            | Data Missing | 10 (1.9%)                 | 4 (4%)                   |                      |
| <b>RPA Class</b>                           |              |                           |                          |                      |
|                                            | Class 3      | 72 (13.8%)                | 23 (23%)                 | 0.0004               |
|                                            | Class 4      | 145 (27.8%)               | 40 (40%)                 |                      |
|                                            | Class 5      | 243 (46.6%)               | 34 (34%)                 |                      |
|                                            | Class 6      | 62 (11.9%)                | 3 (3%)                   |                      |
| <b>Concurrent Chemotherapy</b>             |              |                           |                          |                      |
|                                            | TMZ          | 166 (31.8%)               | 46 (46%)                 | 0.1381               |
|                                            | No TMZ       | 359 (67.5%)               | 51 (56.7%)               |                      |

<sup>^</sup>p value calculated using Chi squared test

KPS - Karnofsky Performance Status; STR - Subtotal Resection

GTR - Gross Total Resection, RTOG – Radiation Therapy Oncology Group

RPA - Recursive Partitioning Analysis; TMZ - Temozolomide

B

| Cox proportional multivariate hazards analysis of patient prognostic survival factors |             |        |                 |
|---------------------------------------------------------------------------------------|-------------|--------|-----------------|
| Variables                                                                             | p value     | HR     | 95% CI          |
| Dexamethasone                                                                         | p = 0.00034 | 1.512  | 1.2058 - 1.8960 |
| RTOG RPA Class                                                                        | p < 0.0001  | 1.5461 | 1.3989 - 1.7088 |
| Temozolomide                                                                          | p = 0.00096 | 0.749  | 0.6312 - 0.8892 |

HR = hazard ratio CI = confidence interval

RTOG - Radiation Therapy Oncology Group

RPA - Recursive Partitioning Analysis

**Table S2. Patient and treatment characteristics with or without DEX at the start of radiotherapy in EORTC (A) and GGN (B)**

**A**

| Characteristics                          | Steroids at baseline |                  |                   | Total (N=573) |
|------------------------------------------|----------------------|------------------|-------------------|---------------|
|                                          | Missing N=1 (0.17%)  | No N=164 (28.6%) | Yes N=408 (71.2%) |               |
| <b>Treatment</b>                         |                      |                  |                   |               |
| RT                                       | 1 (100.0)            | 70 (42.7)        | 215 (52.7)        | 286 (49.9)    |
| TMZ/RT                                   | 0 (0.0)              | 94 (57.3)        | 193 (47.3)        | 287 (50.1)    |
| <b>WHO Performance Status</b>            |                      |                  |                   |               |
| 0                                        | 0 (0.0)              | 80 (48.8)        | 143 (35.0)        | 223 (38.9)    |
| >0                                       | 1 (100.0)            | 84 (51.2)        | 265 (65.0)        | 350 (61.1)    |
| <b>Extent of surgery</b>                 |                      |                  |                   |               |
| Biopsy                                   | 0 (0.0)              | 8 (4.9)          | 85 (20.8)         | 93 (16.2)     |
| Partial Resection                        | 0 (0.0)              | 65 (39.6)        | 189 (46.3)        | 254 (44.3)    |
| Complete Resection                       | 1 (100.0)            | 91 (55.5)        | 134 (32.8)        | 226 (39.4)    |
| <b>Age (continuous)</b>                  |                      |                  |                   |               |
| Median                                   | 62.4                 | 54.0             | 56.7              | 55.8          |
| Range                                    | 62.4 - 62.4          | 19.0 - 70.8      | 18.6 - 70.5       | 18.6 - 70.8   |
| N obs                                    | 1                    | 164              | 408               | 573           |
| <b>Age (class)</b>                       |                      |                  |                   |               |
| <=50                                     | 0 (0.0)              | 23 (14.0)        | 41 (10.0)         | 64 (11.2)     |
| 51-60                                    | 0 (0.0)              | 99 (60.4)        | 240 (58.8)        | 339 (59.2)    |
| >60                                      | 1 (100.0)            | 42 (25.6)        | 127 (31.1)        | 170 (29.7)    |
| <b>last daily dose administered (mg)</b> |                      |                  |                   |               |
| Median                                   |                      |                  | 8.0               | 8.0           |
| Range                                    |                      |                  | 1.0 - 160.0       | 1.0 - 160.0   |
| N obs                                    | 0                    | 0                | 397               | 397           |
| <b>Tercile1</b>                          |                      |                  |                   | 1-4           |
| Median                                   |                      |                  | 4                 | 4             |
| Range                                    |                      |                  | 1-4               | 1-4           |
| <b>Tercile2</b>                          |                      |                  |                   |               |
| Median                                   |                      |                  | 8                 | 8             |
| Range                                    |                      |                  | 5-10              | 5-10          |
| <b>Tercile3</b>                          |                      |                  |                   |               |
| Median                                   |                      |                  | 16                | 16            |
| <b>Range</b>                             |                      |                  | <b>12-160</b>     | <b>12-160</b> |

**B**

| Characteristics        | Steroids N=370 (44.5%) | No Steroids N=462 (55.5%) | p-value |
|------------------------|------------------------|---------------------------|---------|
| <b>Gender</b>          |                        |                           |         |
| Male                   | 213 (57.6%)            | 284 (61.5%)               | 0.254   |
| Female                 | 157 (42.4%)            | 178 (38.5%)               |         |
| <b>Age, y</b>          |                        |                           |         |
| Median (range)         | 63 (19 - 83)           | 60 (22 - 86)              | 0.194   |
| ≤60 y                  | 158 (42.7%)            | 233 (50.4%)               |         |
| >60 y                  | 212 (57.3%)            | 229 (49.6%)               |         |
| <b>KPS</b>             |                        |                           |         |
| <70                    | 28 (7.6%)              | 22 (4.8%)                 | 0.238   |
| 70-80                  | 180 (48.6%)            | 233 (50.4%)               |         |
| ≥90                    | 162 (43.8%)            | 207 (44.8%)               |         |
| <b>Surgical Extent</b> |                        |                           |         |
| biopsy                 | 92 (24.9%)             | 72 (15.6%)                | 0.001   |
| partial                | 48 (13.0%)             | 43 (9.3%)                 |         |
| subtotal               | 113 (30.5%)            | 163 (35.3%)               |         |
| total                  | 117 (31.6%)            | 184 (39.8%)               |         |
| <b>Radiation Dose</b>  |                        |                           |         |
| ≤54 Gy                 | 43 (13.2%)             | 37 (9.8%)                 | 0.152   |
| >54 Gy                 | 282 (86.8%)            | 341 (90.2%)               |         |
| Data Missing           | 45                     | 84                        |         |
| <b>Therapy</b>         |                        |                           |         |
| RT                     | 77 (20.8%)             | 104 (22.5%)               | 0.555   |
| RT+CT                  | 293 (79.2%)            | 358 (77.5%)               |         |

**Table S3. A) PFS and OS in the GGN cohort by steroid use. B) Multivariate analysis of the association of steroid administration and outcome in the GGN cohort.**

**A**

|                          | N<br>(events) | PFS<br>Median in months (95%<br>CI)<br>Events | PFS<br>Median in months<br>(95% CI)<br>Events | HR,<br>p value | OS<br>Median in months<br>(95% CI)<br>Events | OS<br>Median in months<br>(95% CI)<br>Events | HR,<br>p value |
|--------------------------|---------------|-----------------------------------------------|-----------------------------------------------|----------------|----------------------------------------------|----------------------------------------------|----------------|
| Steroids                 |               | -                                             | +                                             |                | -                                            | +                                            |                |
| Events                   |               |                                               |                                               |                |                                              |                                              |                |
| All patients<br>& events | 832           | 7.0<br>(6.5-7.6)<br>441/462                   | 6.1<br>(5.5-6.8)<br>358/370                   | 1.21<br>0.008  | 15.7<br>(14.0-17.4)<br>408/462               | 12.1<br>(10.9-13.2)<br>337/370               | 1.32<br><0.001 |
| RT only                  | 181           | 5.6<br>(4.8-6.5)<br>102/104                   | 4.9<br>(4.2-5.6)<br>75/77                     | 1.21<br>0.215  | 8.8<br>(7.1-10.5)<br>99/104                  | 6.8<br>(5.7-8.0)<br>74/77                    | 1.23<br>0.178  |
| RT/CT                    | 651           | 7.5<br>(6.6-8.5)<br>339/358                   | 6.7<br>(5.9-7.5)<br>283/293                   | 1.23<br>0.010  | 18.8<br>(16.8-20.7)<br>309/358               | 13.3<br>(11.7-14.9)<br>263/293               | 1.37<br><0.001 |
| GTR                      | 301           | 9.5<br>(7.7-11.4)<br>171/184                  | 6.7<br>(5.6-7.7)<br>114/117                   | 1.51<br>0.001  | 22.1<br>(18.7-25.5)<br>158/184               | 15.0<br>(13.2-16.8)<br>105/117               | 1.40<br>0.008  |
| No GTR                   | 531           | 6.1<br>(5.3-6.9)<br>270/278                   | 5.6<br>(4.8-6.4)<br>244/253                   | 1.00<br>0.992  | 12.8<br>(11.1-14.4)<br>250/278               | 10.4<br>(8.7-12.0)<br>232/253                | 1.12<br>0.048  |
| GTR                      |               |                                               |                                               |                |                                              |                                              |                |
| RT only                  | 51            | 5.8<br>(3.8-7.7)<br>33/34                     | 5.4<br>(3.7-7.2)<br>17/17                     | 1.05<br>0.863  | 9.9<br>(8.0-11.8)<br>32/34                   | 10.9<br>(6.0-15.7)<br>17/17                  | 1.20<br>0.539  |
| RT/CT only               | 250           | 11.1<br>(9.3-13.0)<br>138/150                 | 6.7<br>(5.1-8.3)<br>97/100                    | 1.60<br><0.001 | 24.5<br>(20.3-28.7)<br>126/150               | 15.3<br>(13.4-17.2)<br>88/100                | 1.47<br>0.006  |
| No GTR                   |               |                                               |                                               |                |                                              |                                              |                |
| RT only                  | 130           | 5.3<br>(4.2-6.4)<br>69/70                     | 4.5<br>(3.3-5.6)<br>58/60                     | 1.24<br>0.239  | 8.0<br>(6.2-9.8)<br>67/70                    | 6.4<br>(4.8-8.0)<br>57/60                    | 1.20<br>0.320  |
| RT/CT only               | 401           | 6.4<br>(5.5-7.3)<br>201/208                   | 6.5<br>(5.3-7.6)<br>186/193                   | 0.98<br>0.844  | 15.2<br>(13.1-17.3)<br>183/208               | 12.1<br>(10.7-13.4)<br>175/193               | 1.23<br>0.048  |

**B**

| Factor                                          | HR   | 95% CI      | P value |
|-------------------------------------------------|------|-------------|---------|
| Steroids Yes vs. no (ref.)                      | 1.18 | 1.02 - 1.37 | 0.024   |
| Therapy RT vs. RT/CT (ref.)                     | 1.75 | 1.47 - 2.09 | <0.001  |
| Resection No gross total vs. gross total (ref.) | 1.59 | 1.36 - 1.85 | <0.001  |
| Age >60 vs. ≤ 60 (ref.)                         | 2.07 | 1.78 - 2.41 | <0.001  |
| KPS ≤ 80 vs. >80 (ref.)                         | 1.17 | 1.00 - 1.36 | 0.041   |

**Table S4. Genes and top predicted cellular functions and canonical pathways of DEX regulated gene set.**

**A** The 25 most significantly changed probes on illumina mouse-ref-8 array. Gene list based on a greater than 1.5 fold change, with an ANOVA p value > 0.0005.

| Illumina Probeset ID | SYMBOL        | ANOVA p-value | Fold-Change (Dex vs. Untreated) |
|----------------------|---------------|---------------|---------------------------------|
| 1340056              | 6720463M24Rik | 0.00031       | -1.75208                        |
| 4780193              | Aspm          | 0.00036       | -1.59169                        |
| 380520               | Aurka         | 0.00017       | -2.39294                        |
| 7400215              | Birc5         | 0.00019       | -2.15796                        |
| 2810612              | Birc5         | 0.0003        | -2.01431                        |
| 1240446              | Birc5         | 0.00047       | -2.25534                        |
| 5910528              | Bub1b         | 0.00019       | -2.06295                        |
| 2190164              | Ccnb1         | 6.56E-05      | -3.06757                        |
| 7550156              | Ccnb1         | 0.00047       | -3.03562                        |
| 4610722              | Cdc20         | 0.00012       | -3.2905                         |
| 4390228              | Cdc20         | 0.00019       | -2.93043                        |
| 2320678              | Cdc25c        | 3.38E-05      | -1.81601                        |
| 3830328              | Cdc25c        | 5.71E-05      | -2.0114                         |
| 1050170              | Cdca3         | 7.99E-05      | -2.96694                        |
| 4920148              | Cdca3         | 0.00032       | -1.91606                        |
| 1500446              | Cdca8         | 0.00038       | -2.00116                        |
| 7200519              | Cenpa         | 2.32E-05      | -3.48198                        |
| 2710703              | E130306D19Rik | 3.77E-05      | -1.94952                        |
| 630634               | Incenp        | 0.00016       | -1.9118                         |
| 4210246              | Kif22         | 8.05E-05      | -2.67197                        |
| 1780543              | Kif2c         | 0.00011       | -2.61431                        |
| 6940411              | Pif1          | 8.06E-05      | -2.43358                        |
| 520427               | Plk1          | 0.00012       | -2.58357                        |
| 780475               | Prc1          | 0.00049       | -2.65046                        |
| 6620184              | Spc25         | 0.00029       | -1.94168                        |

**B** The top 5-enriched predicted cellular function and canonical pathways, based on the 19 DEX-regulated genes.

| Predicted Cellular Functions               | p-value             | Molecules                                                                                       |
|--------------------------------------------|---------------------|-------------------------------------------------------------------------------------------------|
| Cell Cycle                                 | 1.97E-17 - 3.87E-02 | CDC25C, CDCA8, CDC20, PRC1, PLK1, AURKA, BUB1B, BIRC5, CCNB1, KIF22, ASPM, CENPA, KIF2C, INCENP |
| Cellular Assembly and Organization         | 1.94E-11 - 3.87E-02 | CDC25C, CDCA8, CDC20, PRC1, PLK1, AURKA, BUB1B, BIRC5, PIF1, CCNB1, KIF22, CENPA, KIF2C, INCENP |
| DNA Replication, Recombination, and Repair | 1.94E-11-3.78E-02   | CDC25C, CDCA8, CDC20, PRC1, PLK1, AURKA, BUB1B, BIRC5, CCNB1 KIF22, CENPA, KIF2C, INCENP        |
| Cellular Movement                          | 2.49E-11-3.36E-02   | CDC20, PRC1, PLK1, AURKA, BIRC5, CCNB1, INCENP                                                  |
| Cancer                                     | 1.22E-09-3.91E-02   | CDC25C, CDCA8, CDC20, PRC1, PLK1, AURKA, BUB1B, BIRC5, CCNB1, KIF22, ASPM, CENPA, KIF2C, INCENP |

-© 2000-2013 Ingenuity Systems, Inc. All rights reserved.

| Ingenuity Canonical Pathways                          | -log(p-value) | Molecules                        |
|-------------------------------------------------------|---------------|----------------------------------|
| Mitotic Roles of Polo-Like Kinase                     | 8.64E+00      | CDC25C, CDC20, PRC1, PLK1, CCNB1 |
| Cell Cycle: G2/M DNA Damage Checkpoint Regulation     | 5.15E+00      | CDC25C, PLK1, CCNB1              |
| Role of CHK Proteins in Cell Cycle Checkpoint Control | 2.99E+00      | CDC25C, PLK1                     |
| ATM Signaling                                         | 2.91E+00      | CDC25C, CCNB1                    |
| Hereditary Breast Cancer Signaling                    | 2.35E+00      | CDC25C, CCNB1                    |

-© 2000-2013 Ingenuity Systems, Inc. All rights reserved.
